# Supplementary material
Source: PubMed Central journal article supplement (PMC6626601)
Supplement: NIHMS1037986-supplement-Supplemental_Material.pdf [file NIHMS1037986-supplement-Supplemental_Material.pdf]

**Supplemental Table 1. Comparison of baseline characteristics between participants who were included in the analysis and those who were excluded.**

| Characteristics                              | Included patients<br>N= 18,025 | Excluded patients<br>N=12,443 |
|----------------------------------------------|--------------------------------|-------------------------------|
| Mean age $\pm$ SD (years)                    | 48 (18)                        | 47 (19)                       |
| Male sex, N (%)                              | 9,278 (51.5)                   | 6,383 (51.3)                  |
| Race, N (%)                                  |                                |                               |
| White                                        | 7,620 (42.3)                   | 5,288 (42.5)                  |
| African-American                             | 3,898 (21.6)                   | 2,663 (21.4)                  |
| Hispanic                                     | 4,321 (24.0)                   | 2,999 (24.1)                  |
| Other                                        | 2,190 (12.1)                   | 1,493 (12.0)                  |
| Education, N (%)                             |                                |                               |
| Less than high school                        | 4,354 (24.9)                   | 3,235 (26.0)                  |
| High school graduate                         | 3,898 (22.2)                   | 2,526 (20.3)                  |
| Some college                                 | 5169 (29.5)                    | 3,820 (30.7)                  |
| College graduate                             | 4,099 (23.4)                   | 2,862 (24.0)                  |
| Marital status, N (%)                        |                                |                               |
| Single                                       | 3,399 (21.2)                   | 2,899 (23.3)                  |
| Married                                      | 10,174 (63.3)                  | 7,665 (61.6)                  |
| Divorced/separated                           | 2,497 (15.5)                   | 1,879 (15.1)                  |
| History of current smoking, N (%)            | 2,866 (15.9)                   | 2,003 (16.1)                  |
| Number of people in household, mean $\pm$ SD | 3 $\pm$ 1                      | 3 $\pm$ 1                     |
| Household income, N (%)                      |                                |                               |
| < \$35,000                                   | 7,172 (41.9)                   | 4,952 (39.8)                  |
| \$35,000- \$65,000                           | 3,886 (21.6)                   | 2,787 (22.4)                  |
| > \$65,000                                   | 6,040 (33.5)                   | 4,703 (37.8)                  |
| Physical activity, N (%)                     |                                |                               |
| Sedentary                                    | 11,378 (63.1)                  | 7,814 (62.8)                  |
| Low                                          | 1,116 (6.2)                    | 796 (6.4)                     |
| Moderate                                     | 2,591 (14.4)                   | 1642 (13.2)                   |
| Vigorous                                     | 2,935 (16.3)                   | 2,190 (17.6)                  |
| Average number of drinks per day, mean (SD)  | 3.3 (1.8)                      | 3.4 (2.1)                     |
| Comorbidities, N (%)                         |                                |                               |
| Hypertension                                 | 6,366 (35.3)                   | 4,629 (37.2)                  |
| Diabetes mellitus                            | 2,156 (12.0)                   | 1,468 (11.8)                  |
| Coronary artery disease                      | 682 (3.8)                      | 485 (3.9)                     |
| Congestive heart failure                     | 543 (3.0)                      | 411 (3.3)                     |
| Stroke                                       | 658 (3.7)                      | 435 (3.5)                     |
| Pulmonary disease                            | 1,043 (5.7)                    | 722 (5.8)                     |
| Chronic kidney disease                       | 650 (3.6)                      | 423 (3.4)                     |
| Liver disease                                | 642 (3.5)                      | 460 (3.7)                     |
| Malignancy                                   | 1,655 (9.1)                    | 1,145 (9.2)                   |
| Metabolic risk factors, N (%) <sup>a</sup>   |                                |                               |
| Impaired fasting glucose                     | 5,100 (28.2)                   | 3,559 (28.6)                  |
| Low HDL level                                | 5,225 (28.9)                   | 3,571 (28.7)                  |

|                               |              |              |
|-------------------------------|--------------|--------------|
| Elevated triglycerides        | 5,474 (30.3) | 3,795 (30.5) |
| Elevated blood pressure       | 8,139 (45.1) | 5,649 (45.4) |
| Increased waist circumference | 9,052 (50.2) | 6,209 (49.9) |
| BMI, Mean (SD)                | 28.9 (6.9)   | 28.3 (7.1)   |
| Mean PHQ-9 score, (SD)        | 3.0 (0.9)    | 3.1 (1)      |
| Antidepressant use, N (%)     | 974 (5.4)    | 722 (5.9)    |
| Statin use, N (%)             | 3,612 (20.0) | 2526 (20.3)  |

MHN = metabolically healthy normal weight; MHO = metabolically healthy obesity; MUN = metabolically unhealthy normal weight; MUO = metabolically unhealthy obesity; BMI= body mass index, MetS= Metabolic syndrome, PHQ = Patient Health Questionnaire, SD= Standard deviation

<sup>a</sup> Impaired fasting glucose defined as fasting glucose  $\geq 100$  milligrams per deciliter (mg/dL), low HDL cholesterol defined as values  $<40$  mg/dL in men or  $<50$  mg/dL in women, Elevated triglycerides defined as values  $\geq 150$  mg/dL; elevated blood pressure defined as values  $\geq 130/85$  mm Hg; increased waist circumference defined as measurements  $\geq 102$  cm in men or  $\geq 88$  cm in women: Obesity defined as BMI  $\geq 30$ .

**Supplemental Table 2. Comparison of baseline characteristics between participants with and without data on CRP levels.**

| Characteristics                              | Patients with CRP<br>levels<br>N= 5,874 | Patients without<br>CRP levels<br>N=12,151 |
|----------------------------------------------|-----------------------------------------|--------------------------------------------|
| Mean age $\pm$ SD (years)                    | 48.4 (16)                               | 48.8 (17)                                  |
| Male sex, N (%)                              | 3,013 (51.3)                            | 6,258 (51.5)                               |
| Race, N (%)                                  |                                         |                                            |
| White                                        | 2,502 (42.6)                            | 5,164 (42.5)                               |
| African-American                             | 1,263 (21.5)                            | 2,588 (21.3)                               |
| Hispanic                                     | 1,421 (24.2)                            | 2,941 (24.2)                               |
| Other                                        | 688 (11.7)                              | 1,458 (12.0)                               |
| Education, N (%)                             |                                         |                                            |
| Less than high school                        | 1,457 (24.8)                            | 3,184 (26.2)                               |
| High school graduate                         | 1,310 (22.3)                            | 2,442 (20.1)                               |
| Some college                                 | 1,715 (29.2)                            | 3,706 (30.5)                               |
| College graduate                             | 1,386 (23.6)                            | 2,941 (24.2)                               |
| Marital status, N (%)                        |                                         |                                            |
| Single                                       | 1,257 (21.4)                            | 2,819 (23.2)                               |
| Married                                      | 3,706 (63.1)                            | 7,497 (61.7)                               |
| Divorced/separated                           | 911 (15.5)                              | 1,835 (15.1)                               |
| History of current smoking, N (%)            | 922 (15.7)                              | 1,920 (15.8)                               |
| Number of people in household, mean $\pm$ SD | 3 $\pm$ 1                               | 3 $\pm$ 1                                  |
| Household income, N (%)                      |                                         |                                            |
| < \$35,000                                   | 2,455 (41.8)                            | 4,812 (39.6)                               |
| \$35,000- \$65,000                           | 1,275 (21.7)                            | 2,734 (22.5)                               |
| > \$65,000                                   | 1,968 (33.5)                            | 4,605 (37.9)                               |
| Physical activity, N (%)                     |                                         |                                            |
| Sedentary                                    | 3,718 (63.3)                            | 7,594 (62.5)                               |
| Low                                          | 358 (6.1)                               | 766 (6.3)                                  |
| Moderate                                     | 846 (14.4)                              | 1,592 (13.1)                               |
| Vigorous                                     | 952 (16.2)                              | 2,199 (18.1)                               |
| Average number of drinks per day, mean (SD)  | 3.2 (2.3)                               | 3.5 (1.3)                                  |
| Comorbidities, N (%)                         |                                         |                                            |
| Hypertension                                 | 2,015 (34.3)                            | 4,399 (36.2)                               |
| Diabetes mellitus                            | 687 (11.7)                              | 1,434 (11.8)                               |
| Coronary artery disease                      | 229 (3.9)                               | 450 (3.7)                                  |
| Congestive heart failure                     | 164 (2.8)                               | 377 (3.1)                                  |
| Stroke                                       | 206 (3.5)                               | 401 (3.3)                                  |
| Pulmonary disease                            | 317 (5.4)                               | 693 (5.7)                                  |
| Chronic kidney disease                       | 193 (3.3)                               | 413 (3.4)                                  |
| Liver disease                                | 229 (3.9)                               | 437 (3.6)                                  |
| Malignancy                                   | 546 (9.3)                               | 1,106 (9.1)                                |
| Metabolic risk factors, N (%) <sup>a</sup>   |                                         |                                            |

|                               |              |              |
|-------------------------------|--------------|--------------|
| Impaired fasting glucose      | 1,651 (28.1) | 3,439 (28.3) |
| Low HDL level                 | 1,698 (28.9) | 3,500 (28.8) |
| Elevated triglycerides        | 1,774 (30.2) | 3,657 (30.1) |
| Elevated blood pressure       | 2,655 (45.2) | 5,480 (45.1) |
| Increased waist circumference | 2,949 (50.2) | 6,088 (50.1) |
| BMI, Mean (SD)                | 28.6 (6.9)   | 28.8 (7.0)   |
| Mean PHQ-9 score, (SD)        | 3.0 (1.2)    | 3.0 (1)      |
| Antidepressant use, N (%)     | 300 (5.1)    | 644 (5.3)    |
| Statin use, N (%)             | 1,186 (20.2) | 2,442 (20.1) |

MHN = metabolically healthy normal weight; MHO = metabolically healthy obesity; MUN = metabolically unhealthy normal weight; MUO = metabolically unhealthy obesity; BMI= body mass index, MetS= Metabolic syndrome, PHQ = Patient Health Questionnaire, SD= Standard deviation

<sup>a</sup> Impaired fasting glucose defined as fasting glucose  $\geq 100$  milligrams per deciliter (mg/dL), low HDL cholesterol defined as values  $<40$  mg/dL in men or  $<50$  mg/dL in women, Elevated triglycerides defined as values  $\geq 150$  mg/dL; elevated blood pressure defined as values  $\geq 130/85$  mm Hg; increased waist circumference defined as measurements  $\geq 102$  cm in men or  $\geq 88$  cm in women: Obesity defined as BMI  $\geq 30$ .

**Supplemental Figure. Frequency of CRP  $\geq 3$  in participants classified by obesity and metabolic status.**

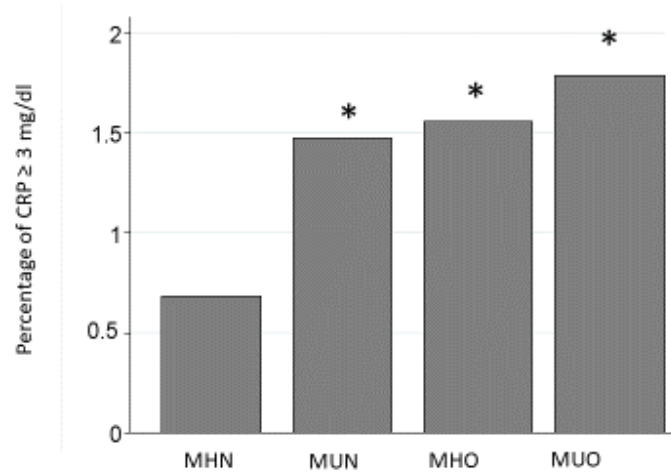

MHN: Metabolically healthy normal weight, MHO: Metabolically healthy obesity, MUN: Metabolically unhealthy normal weight, MUO: Metabolically unhealthy obesity; \*:  $P < 0.001$  compared to MHN
